# Supplementary material for: An i-motif-regulated enhancer, eRNA and adjacent lncRNA affect Lhb expression through distinct mechanisms in a sex-specific context
Source: PubMed Central journal article supplement — Cell Mol Life Sci. 2024 Aug 19;81(1):361. doi: 10.1007/s00018-024-05398-7 (PMC11335282; doi:10.1007/s00018-024-05398-7), 2024-08-19
Supplement: 18_2024_5398_MOESM1_ESM.pdf [file 18_2024_5398_MOESM1_ESM.pdf]

## Supplementary Materials– Tables 1-7

**Table S1.** shRNA sequences and CRISPR dCas9 gRNAs

| Description              | Location (bp upstream of the gene) | Sequence              |
|--------------------------|------------------------------------|-----------------------|
| gRNA1 (617 in mass spec) | <i>Lhb</i> (-3676)-(-3657)         | ATCCAGAGCTTCCTGCGGGC  |
| gRNA3 (618 in mass spec) | <i>Lhb</i> (-3800)-(-3781)         | CTCCCTAATGCCGGCATTAA  |
| gRNA4 (p594)             | <i>Lhb</i> (-3565)-(-3546)         | TTAAAACCTGGACCGTTGCTG |
| shRNA for eRNAs          |                                    |                       |
| #1 (p591)                | <i>Lhb</i> (-3754)-(-3736)         | AGAAGATAAATCAAGGCG    |
| #2 (p549)                | <i>Lhb</i> (-4872)-(-4854)         | TTCCCAAGCCTGGACCTCA   |
| #3 (p544)                | <i>Lhb</i> (2632)-(-2614)          | CCAGGGGCAACGGTCACAA   |
| #4 (p548)                | <i>Lhb</i> (2632)-(-2614)          | TTGTGACCGTTGCCCTGG    |
| shRNA for Hmgb2          | <i>Hmgb2</i> (+817)-(+835) exon2   | CCAAGAAATGCTCCGAGAG   |

**Table S2.** U1 site mutations

| LncRNA site          | Sequence   | Mutated sequence |
|----------------------|------------|------------------|
| End of exon 1        | CAG GTGAGA | CAG CCGAGA       |
| End of exon 2        | AAG GTAGGG | AAG CCAGGG       |
| End of exon 3        | CAG GTAGAG | CAG CCAGAG       |
| End of exon 4        | AAG GTGAGC | AAG CCGAGC       |
| Mid intron 1 (-2330) | AAG GTGGAG | AAG CCGGAG       |
| Mid intron 3 (-1473) | CAG GTAGGA | CAG CCAGGA       |

**Table S3.** Primers

| Primer #                                              | Gene ( <i>Lhb</i> unless noted) and position | Sequence (5' to 3')      |
|-------------------------------------------------------|----------------------------------------------|--------------------------|
| <b>Primers used for CHIP (many used also for PCR)</b> |                                              |                          |
| 1490                                                  | -5228F                                       | GTGAGCTGGCAGTATGCCGA     |
| 1491                                                  | -5086R                                       | CGTCTCGAAGAAGTACTGAC     |
| 596                                                   | -5005F                                       | GCTCTCAGAATGCAAGGCTA     |
| 614                                                   | -4796R                                       | GGTCCTTTCAGCATCCAGCT     |
| 595                                                   | -4435F                                       | CTCCATCCTGAACATCATAAAC   |
| 1518                                                  | -4326R                                       | CAGACAAGGCTGGCTTCAAC     |
| 594                                                   | -4275F                                       | TATGTACTGTAATCCTAATGCTTA |
| 613                                                   | -4076R                                       | CAGGTGGACTTGTCTGGTG      |
| 1583                                                  | -3775F                                       | TACATCACCCTGTGTGGCT      |
| 1584                                                  | -3705F                                       | TGTATTATGCAGTCAGTGCTG    |
| 1535                                                  | -3662R                                       | CAGGAAGCTCTGGATTCCAT     |
| 1536                                                  | -3638R                                       | TTCAGATGAGGGAGCTCCTG     |
| 1619                                                  | -3610F                                       | CCTTCCAATGCTTTGGGAC      |
| 1527                                                  | -3567R                                       | CCAGCCTGAGCTTGGTGAG      |
| 1620                                                  | -3533R                                       | TTAAGGTCATCCTCAGCAAC     |
| 546                                                   | -3485F                                       | TTGAGTGTTTTGCCTGCATG     |

|      |                          |                           |
|------|--------------------------|---------------------------|
| 1521 | -3458F                   | GGGTCTTCATGCATGGGTGT      |
| 612  | -3286R                   | TGATCTACTCTACTCGCACAC     |
| 450  | -3257F                   | CCTCCTTGGTGTGGAGAAA       |
| 451  | -3102R                   | GAGAGTGGGAGGTGGCTAGA      |
| 1384 | -2802F                   | TGTATTCCCTCACCTCACCT      |
| 1385 | -2633R                   | TAACAGAACCTGCCACTCT       |
| 572  | -2432F                   | TCTGCCTACTCTCCAGGTGA      |
| 548  | -2255F                   | CTGATCTATGCGCCTCACA       |
| 112  | -2196R                   | TTTCGAGACTGCAGGCAGGG      |
| 562  | -2096R                   | TGGGGTCCTTGTGCTCTGGT      |
| 1943 | -635F                    | GGCCTACTGCACTGAGAATT      |
| 907  | -520F                    | GACACACCCCTTACTTCCAGAG    |
| 1944 | -474R                    | GATCAGTAAATTGCGCCTGG      |
| 909  | -424F                    | ATCCTGATTAGGGGCTGGGAG     |
| 908  | -421R                    | GGATGCCTGGATTGGGTCCAA     |
| 910  | -325R                    | GGCACAGCTTCAACCTTAGGTT    |
| 913  | -235F                    | CTCCCCTTACCTTGTTTCCCGT    |
| 1937 | -225F                    | CCTTGTTTCCCGTGCTTCCA      |
| 915  | -141F                    | TCCCTGGCTTCCCTGACCTTG     |
| 914  | -136R                    | CAGGGACTAGCTCCAGTGTC      |
| 1938 | -79R                     | TGGGTAACCTAGACACTAATC     |
| 1935 | -68F                     | CACTACTTAGTGGCCTTGCC      |
| 917  | -44F                     | CCACAACCCGCAGGTATAA       |
| 916  | -42R                     | TGGGGGTGGCAAGGCCACTA      |
| 919  | +51F                     | AATCCCACCAAACCCATAGATG    |
| 918  | +54R                     | GATTGGGAAGTACCCTGGG       |
| 1936 | +61R                     | TGGTGGGATTGGGAAGTACC      |
| 1939 | +62F                     | AACCCATAGATGGACAGCCT      |
| 955  | +106F                    | AGAGGAGGGGGTCTCCTA        |
| 920  | +150R                    | GTTTATCTCCTGTTTGAAGTCCAC  |
| 1940 | +250R                    | TCACTCTACCCCTGACCTG       |
| 966  | +271R                    | CCCTGGGACATAGCCAGTG       |
| 286  | <i>Atoh</i> F            | CCCTCACTCAGGTCGCCTG       |
| 287  | <i>Atoh</i> R            | CGTGCGAGGAGCCAATCA        |
| 382  | mCga -5139R              | GCGTTCACAATAACTTGTAACC    |
| 440  | mCga -5377F              | TTGGGAACCTTTGTTTTGACACTTT |
| 3093 | G4 positiveF Cga intron1 | TGGCAATAGGGGAATTTCCAG     |
| 3094 | G4 positiveR Cga intron1 | TAACCGGATCTGTTTGAATC      |
| 3124 | G4 negative              | CTGAAGTTCATTATGCAATGTTG   |
| 3123 | G4 negative              | CCCCTATATCAGTTGTTATATTC   |
| 1959 | mZnf2F intron            | AGATTGGATGCTCCTGTAGG      |

|                                                                |               |                          |
|----------------------------------------------------------------|---------------|--------------------------|
| 1960                                                           | mZnr2R intron | CCTGAGAACAAGCCACAGC      |
| <b>3C Primers</b>                                              |               |                          |
| 598                                                            | -6005F        | CCAGCAGCCAAGTCAGTCTC     |
| 597                                                            | -5105F        | GTCAGTACTTCTTCGAGACG     |
| 596                                                            | -5005F        | GCTCTCAGAATGCAAGGCTA     |
| 595                                                            | -4435F        | CTCCATCCTGAACATCATAAAC   |
| 594                                                            | -4275F        | TATGTACTGTAATCCTAATGCTTA |
| 546                                                            | -3485F        | TTGAGTGTTCCTGCATG        |
| 111                                                            | -2513F        | GGTACTTGGAACCTGGCCCA     |
| 593                                                            | -2375F        | ACTTGTGTGCCAGGAGGAAA     |
| 59                                                             | -1991F        | GAATCTTTGGGCTCCCTC       |
| 549                                                            | -1355F        | CCACTAAGTGTTGGATAGG      |
| 545                                                            | +379F         | TCTGCCAGTCTGCATCACC      |
| 44                                                             | +344F         | GCCTGTCAACGCAACTCTGG     |
| <b>UMI-4C primers</b>                                          |               |                          |
| <i>Lhb</i> downstream (nested)                                 |               | GTCCAAAATAGGTGTGGTTTCAGC |
| <i>Lhb</i> upstream (outer)                                    |               | CCCTAATCAGGATGCCTGGA     |
| <b>Additional Primers for eRNA and lncRNA characterization</b> |               |                          |
| 1387                                                           | -4856R        | CCCAAGCCTGGACCTCAG       |
| 563                                                            | -2825F        | AGCCTGTCTGTCTGTGTCT      |
| 564                                                            | -2606R        | CCGGCTTGTGTGACCGTTG      |
| 1424                                                           | -2655F        | TTCAGAGTGGGCAGGTTCTG     |
| 2276                                                           | -2575F        | ATGGCAGGTGCAACCCTAGC     |
| 2286                                                           | -2152R        | GGGGTGTATGTAGACTGTGA     |
| 2278                                                           | -2232F        | TCTATGGTCAAGGCACCCCT     |
| 2279                                                           | -2061R        | CTTTCTGCCAAAGACTTGATG    |
| 2280                                                           | -1966F        | CTAAGAAGACATGAGGGACG     |
| 2281                                                           | -1803R        | CTGAGAAGGTCCCCGCGA       |
| 60                                                             | -1743R        | CAGGCTCCTCCTGCAGTGC      |
| 2282                                                           | -1235F        | GCCCTCATCCCCTGGACGA      |
| 2283                                                           | -1117R        | CTTGTGAAGTCACTTGCAGTA    |
| 55                                                             | -952F         | ATCTGAACTCTGCTGCACTT     |
| 2284                                                           | -903F         | GAACGTGTCTGGATATCCCC     |
| 2285                                                           | -582R         | TCACAGCAGCTCCGCCCTG      |
| 367                                                            | -394R         | GCACCACCGTCTCCAGCCC      |
| 181                                                            | -151R         | GTGTCCCAGTGAATTGGCCTCA   |
| 2311                                                           | -863R         | GCCCATCACCGTTTCTGGT      |
| 2312                                                           | -2593F        | CAGAGAAGGTGAGGACCATG     |
| 2313                                                           | -2611F        | AGCCGTTTCTTGGCTTCC       |
| 2314                                                           | -1106R        | CACAGGCTCACCTTGTGAA      |
| 2315                                                           | -1088R        | TCACCAGCGCTGCTGGG        |
| 2316                                                           | -880R         | GGTGGGGATATCCAGACAC      |
| 2324                                                           | -814R         | CTCGGTAACTTGCCCGATC      |

|                                   |                                                             |                       |
|-----------------------------------|-------------------------------------------------------------|-----------------------|
| 2326                              | -729R                                                       | GTGCACCAAGGGTCCGTAG   |
| 2321                              | -643R                                                       | ACACTGTAAAGGCCAGCAC   |
| 612                               | -3286R                                                      | TGATCTACTCTACTCGCACAC |
| 2300                              | -3685R                                                      | CAGCACTGACTGCATAATACA |
| 2317                              | +691R                                                       | CCCGGTGGGCAGCCAGG     |
| 493                               | +572R                                                       | AAGCCCTCTTCTGAGTGTC   |
| <b>Gene expression levels PCR</b> |                                                             |                       |
| 46                                | <i>Lhb</i> (+601)F                                          | TGCCGGCTGCTTTGCCTCCT  |
| 45                                | <i>Lhb</i> (+796)R                                          | CAGGCCATTGGTTGAGTCCT  |
| 350                               | <i>Lhb</i> (2 <sup>nd</sup> +3 <sup>rd</sup> ) exon (+590)F | CTAGCATGGTCCGAGTACTG  |
| 351                               | <i>Lhb</i> 3 <sup>rd</sup> exon (+727)R                     | CTGAGGGCTACAGGAAAGGA  |
| 184                               | <i>Rplp0</i> F                                              | GCGACCTGGAAGTCCAACCTA |
| 185                               | <i>Rplp0</i> R                                              | ATCTGCTTGGAGCCCACAT   |
| 1384                              | eRNA1 F <i>Lhb</i> (-2802)                                  | TGTATTCCCTCACCTCACCT  |
| 1385                              | eRNA1 R <i>Lhb</i> (-2633)                                  | TAACAGAACCTGCCACTCT   |
| 1583                              | eRNA1 F <i>Lhb</i> (-3775)                                  | TACATCACCCTGTGTGGCT   |
| 1534                              | eRNA1 R <i>Lhb</i> (-3682)                                  | CCCCAGCACTGACTGCATAA  |
| 1961                              | <i>Znrf2</i> F cDNA                                         | ACAGGACTCAGTGCACAGC   |
| 1962                              | <i>Znrf2</i> R cDNA                                         | TGAGCATACCGGGCACTTA   |
| 1923                              | <i>Hmgb2</i> F                                              | CGACTCGTGGTGAACCTTCG  |
| 1924                              | <i>Hmgb2</i> R                                              | CTTCGGAGCATTGGGGTCTT  |
| 1672                              | <i>Greb1</i> 3 <sup>rd</sup> exon F                         | GCCGAGCAGACAATGAGGAA  |
| 1673                              | <i>Greb1</i> 4 <sup>th</sup> exon R                         | CAGGCTGGGAGACTTAGCAC  |

**Table S4** Oligonucleotides used for CD

| Description                       | Sequence                           |
|-----------------------------------|------------------------------------|
| <i>Lhb</i> G-quadruplex           | GGAAAGGTGGGGGTGGGGGTGGGGTGGGGTGGGG |
| <i>Lhb</i> G4 kill4               | GGAAAGGTGGTGGTGGTGGTGGGGTGGAGTGGTG |
| <i>Lhb</i> G4 kill5               | GGAAAGGTGGTGGTGGTGGTGGTGTGGTGTGGTG |
| <i>Lhb</i> G4 kill7               | GGAAAGGTGGAGGTGGAGGTGGTGTGTGATGAGT |
| <i>Lhb</i> G-quadruplex mutated   | GGAAAGGTGTTTGTGTTTGTGTTGTGTTGTGTTG |
| <i>c-MYC</i> G-quadruplex (human) | GGGGAGGGTGGGGAGGGTGGGGAAGGTGGGG    |
| <i>Lhb</i> i-motif                | CCCCACCCACCCACCCACCCACCCCTTTCC     |
| <i>Lhb</i> i-M kill4              | CTCCACACCACCCACCTCCACCTCCACCTTTCC  |
| <i>Lhb</i> i-M kill7              | TCACAACCTCACTCCACCACCACCACCTTTCC   |
| <i>Lhb</i> i-motif mutated        | CTTCACTTCACTTCACTTTCACCTTTCC       |
| <i>c-MYC</i> i-motif (human)      | CCCCACCTTCCCACCTCCCACCTCCCC        |

**Table S5** Constructs for protein pull down

| #   | Description                                                                  |
|-----|------------------------------------------------------------------------------|
| 507 | Control construct, dCas9 without any gRNA                                    |
| 617 | dCAS9 with gRNA1 (Table S3) targeting (-3676) -(3658) upstream of <i>Lhb</i> |
| 618 | dCAS9 with gRNA3 (Table S3) targeting (-3800) -(3781) upstream of <i>Lhb</i> |

**Table S6.** Sequences upstream of the *Lhb* gene predicted to form G-quadruplex (by both pqsfinder and G4 Hunter). All are shown 5' to 3'.

| Description                       | Strand of G4 | Putative G4 forming sequence                          | Pqsfinder score | G4 Hunter score |
|-----------------------------------|--------------|-------------------------------------------------------|-----------------|-----------------|
| <i>Lhb</i> enhancer               | (-)          | GGGGGTGGGGGTGGGGTGGGGTGGGG                            | 115             | 3.385           |
| LncRNA promoter                   | (-)          | GAGTGGGAGGTGGCTAGAGGGTGGG                             | 52              | 1.48            |
|                                   | (-)          | AACGGGGGAGGGGAGGGGGTATGGG                             | 94              | 2.56            |
|                                   | (-)          | TGGGTATGGGGGGCTGGGGAGACTG                             | 70              | 1.96            |
| LncRNA 1 <sup>st</sup> intron     | (+)          | GGGTGGAGGGTGAGATAGGAAAGGGGG                           | 57              | 1.76            |
|                                   | (+)          | GGGGTCTGGGAGCCTGGATACCAGGAGTTGGAGGAAG                 | 53              | 1.4             |
| LncRNA 3 <sup>rd</sup> Exon       | (-)          | GGTGGTCAGCGAGCTCTGGGGGCTGGGGCTCTGCAA<br>GAGGGGGGCACTC | 81              | 1.84            |
| <i>Lhb</i> 1 <sup>st</sup> intron | (-)          | ATGGGTTTGGTGGGATTGGGAAGTACCCTGGG                      | 52              | 1.28            |
|                                   | (+)          | GGGGGTTGGAGGAGGGAGAGGGGGG                             | 103             | 2.16            |

**Table S7.** Proteins detected ( $\geq 3$  peptides) following pull-down with both probes (617 and 618) and not with the control (507)

| Gene names | $\Sigma$ Coverage | $\Sigma$ # Unique Peptides | $\Sigma$ # Peptides | $\Sigma$ # PSMs | 507      | 617      | 618      |
|------------|-------------------|----------------------------|---------------------|-----------------|----------|----------|----------|
|            |                   |                            |                     |                 | A2: Area | B2: Area | C2: Area |
| Hmgb2      | 18.1              | 4                          | 4                   | 9               | 0.00E+00 | 2.59E+07 | 3.36E+06 |
| Afdn       | 2.88              | 4                          | 4                   | 5               | 0.00E+00 | 4.53E+06 | 2.12E+06 |
| Gss        | 6.33              | 3                          | 3                   | 4               | 0.00E+00 | 1.70E+07 | 2.11E+06 |
| Trove2     | 5.76              | 3                          | 3                   | 5               | 0.00E+00 | 1.29E+07 | 2.73E+06 |
| Stoml2     | 11.05             | 3                          | 3                   | 6               | 0.00E+00 | 3.50E+06 | 4.18E+06 |
| Tecr       | 8.53              | 3                          | 3                   | 4               | 0.00E+00 | 3.90E+07 | 6.76E+06 |
| Camk2d     | 25                | 3                          | 3                   | 5               | 0.00E+00 | 6.22E+06 | 1.95E+06 |

The peptides were filtered with high confidence and passed the 1% FDR threshold. Semi quantitation was performed by calculating the peak area of each peptide: the area is the average of the three most intense peptides from each protein.
